# Supplementary material for: Impact of the Metal–Organic Frameworks Polymorphism on the Electrocatalytic Properties of CeO2 toward Oxygen Evolution
Source: PubMed Central journal article supplement (PMC11656357; doi:10.1021/acsomega.4c08837), 2024-11-29
Supplement: ao4c08837_si_001.pdf [file ao4c08837_si_001.pdf]

# **Impact of the Metal-Organic Frameworks Polymorphism on the Electrocatalytic Properties of CeO<sub>2</sub> Toward Oxygen Evolution**

Nicolle Pauline de Araújo Mendes<sup>a</sup>, Antonio Lopes de Souto Neto<sup>a</sup>, Johnnys da Silva Hortêncio<sup>a</sup>, André L. Menezes de Oliveira<sup>b</sup>, Rafael A. Raimundo<sup>c,d</sup>, Daniel Araújo Macedo<sup>d</sup>, Fausthon Fred da Silva,<sup>a\*</sup>

<sup>a</sup> *Departamento de Química, Universidade Federal da Paraíba (UFPB), 58.051-900, João Pessoa – PB, Brazil.*

<sup>b</sup> *Núcleo de Pesquisa e Extensão LACOM, Departamento de Química, Universidade Federal da Paraíba, 52051-85, João Pessoa-PB, Brazil*

<sup>c</sup> *TEMA - Centre for Mechanical Technology and Automation, Department of Mechanical Engineering, University of Aveiro, 3810-193, Aveiro, Portugal.*

<sup>d</sup> *Programa de Pós-Graduação em Ciência e Engenharia de Materiais - PPECM, Universidade Federal da Paraíba (UFPB), 58.051-900, João Pessoa, PB, Brazil.*

\*Corresponding author: fausthon@quimica.ufpb.br

## **Supplementary information file**

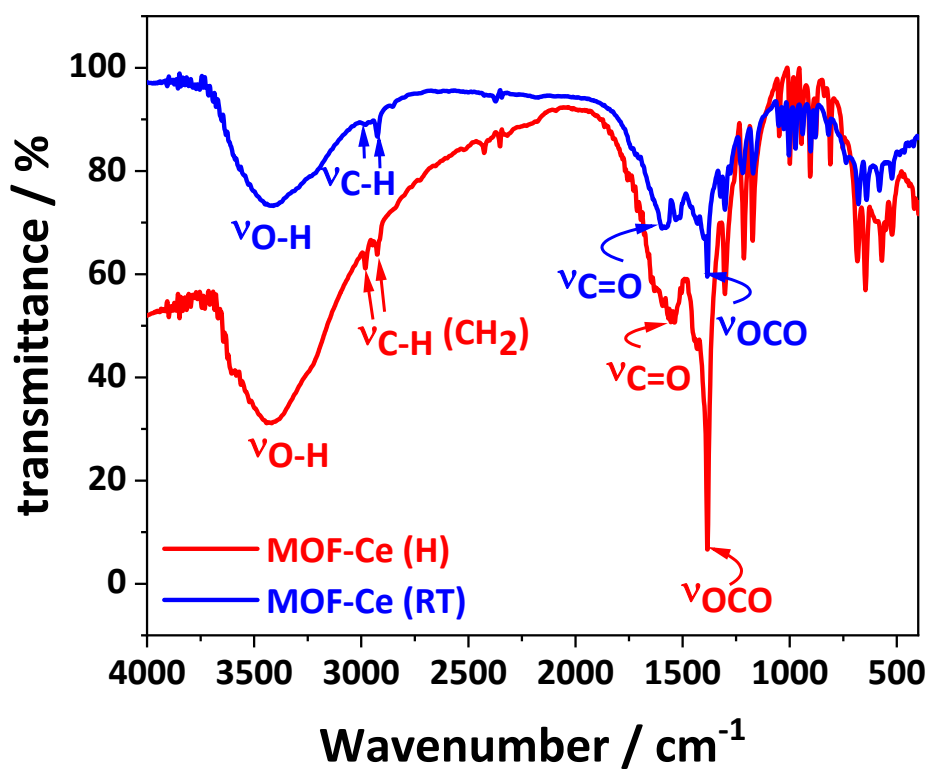

Figure S1: MOF-Ce (H) and MOF-Ce (RT) infrared spectra.

Table S1: Rietveld refinement data for the CeO<sub>2</sub> samples.

| <i>samples</i>                | <i>CeO<sub>2</sub> – ICSD 61595</i> |       | <i>agreement factors</i> |               |             |
|-------------------------------|-------------------------------------|-------|--------------------------|---------------|-------------|
|                               | Size (nm)                           | a (Å) | $R_{wp}$ (%)             | $R_{exp}$ (%) | $\chi^2$    |
| CeO <sub>2</sub> – ICSD 61595 | ---                                 | 5.41  | ---                      | ---           | ---         |
| Sample 1                      | 8.3                                 | 5.41  | 9.41                     | 10.06         | <b>0.94</b> |
| Sample 2                      | 6.2                                 | 5.41  | 9.49                     | 10            | <b>0.95</b> |

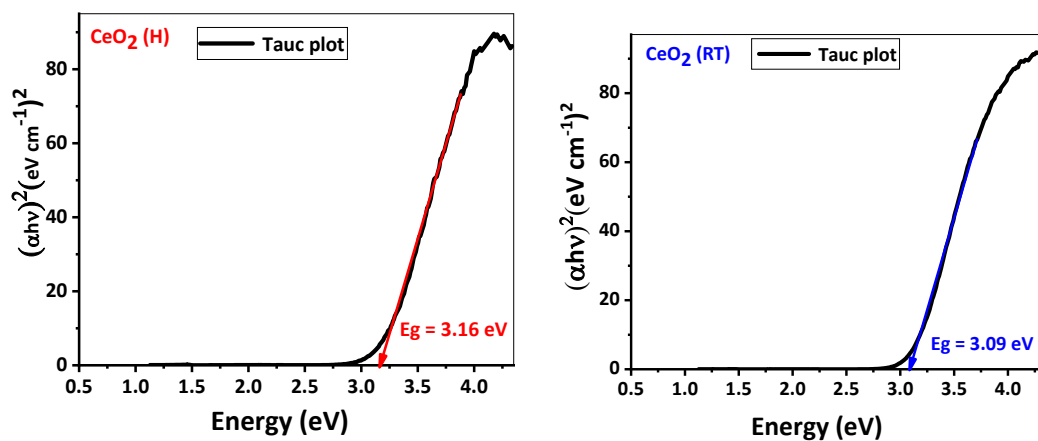

Figure S2: Tauc plots and bandgaps of the  $\text{CeO}_2$  (H) and  $\text{CeO}_2$  (RT).

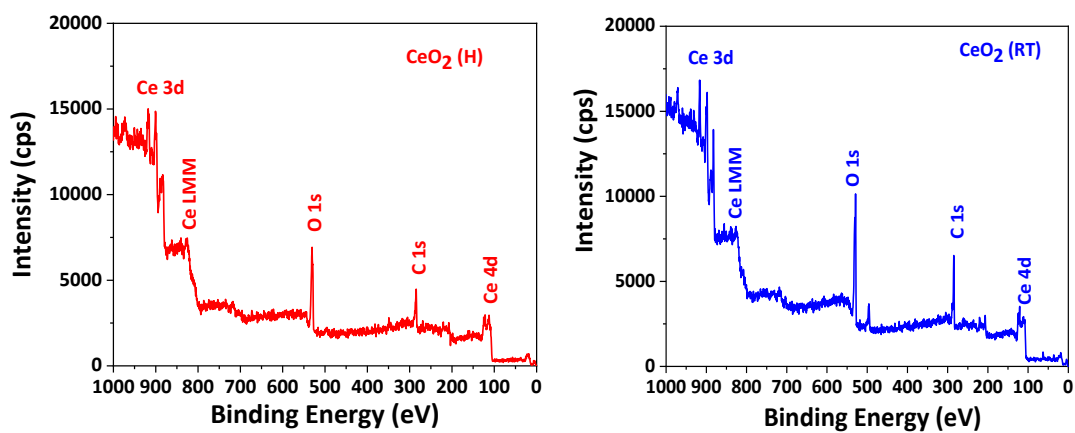

Figure S3: XPS survey spectra of  $\text{CeO}_2$  (H) and  $\text{CeO}_2$  (RT)

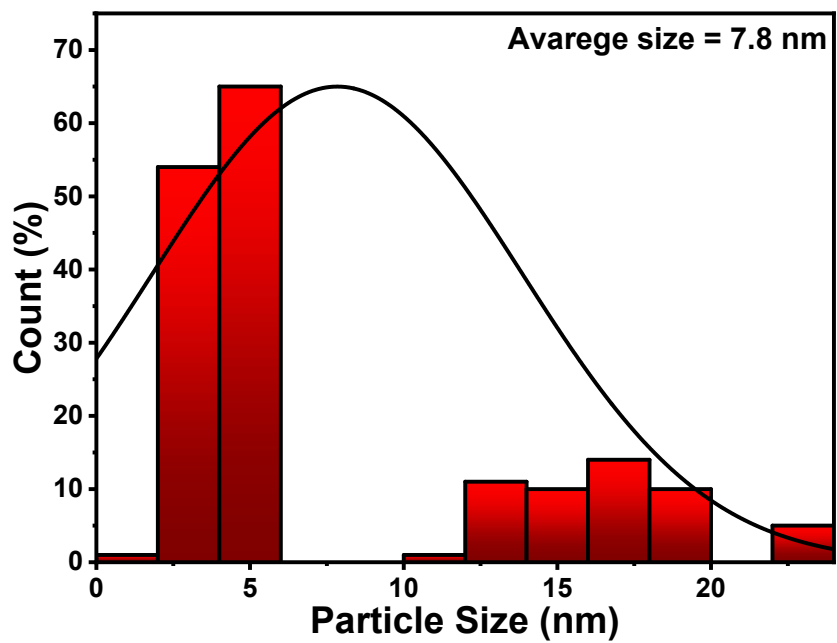

Figure S4: Particle size distribution for the CeO<sub>2</sub> (H) sample.

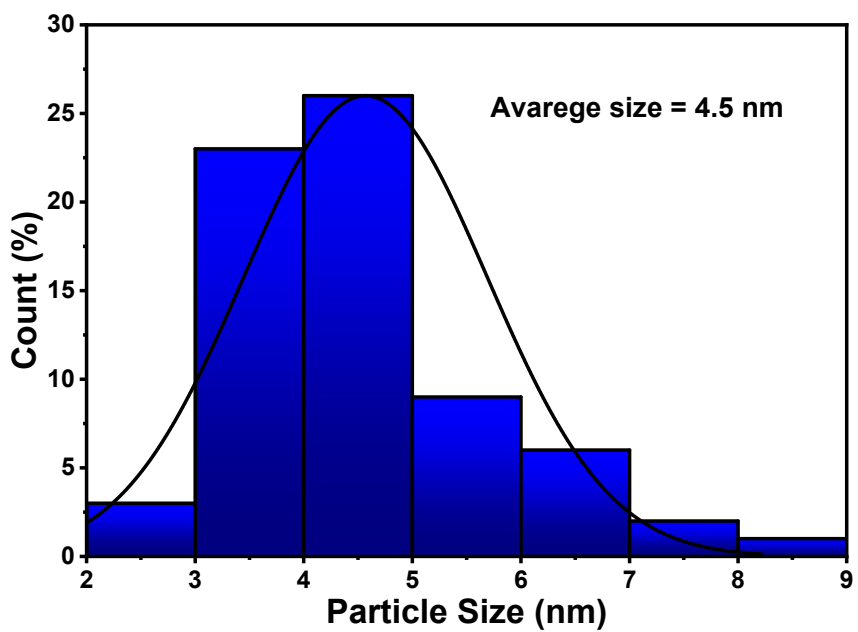

Figure S5: Particle size distribution for the CeO<sub>2</sub> (RT) sample.

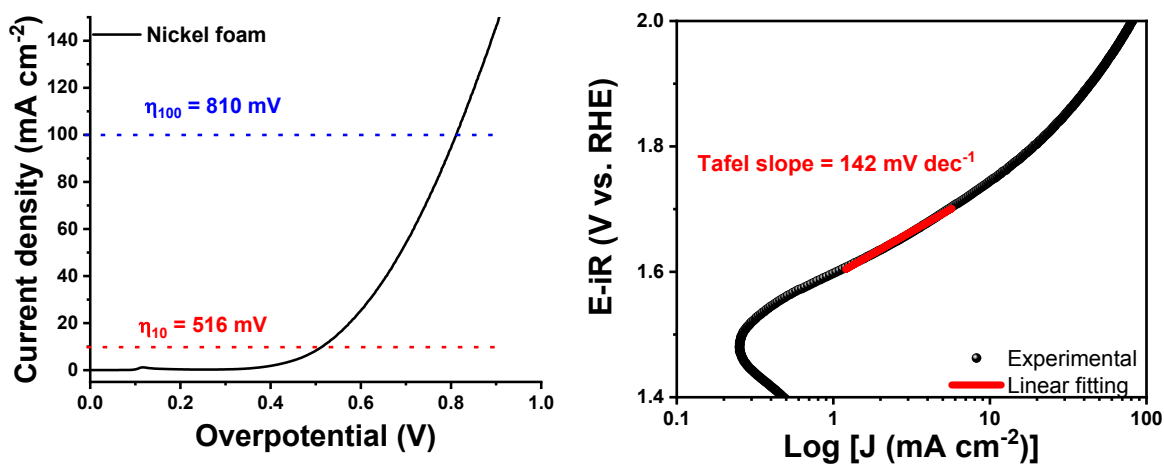

Figure S6: LSV curve and Tafel slope of the Ni foam substrate.

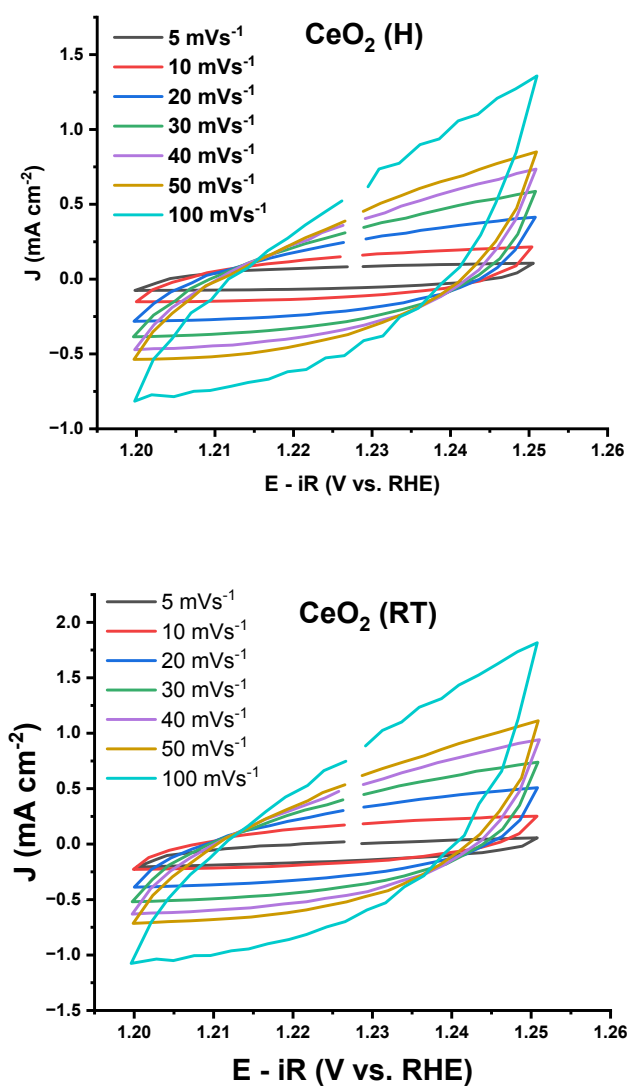

Figure S7: Cyclic Voltammograms of  $\text{CeO}_2$  (H) and  $\text{CeO}_2$  (RT) with scanning range of 10-100mV.

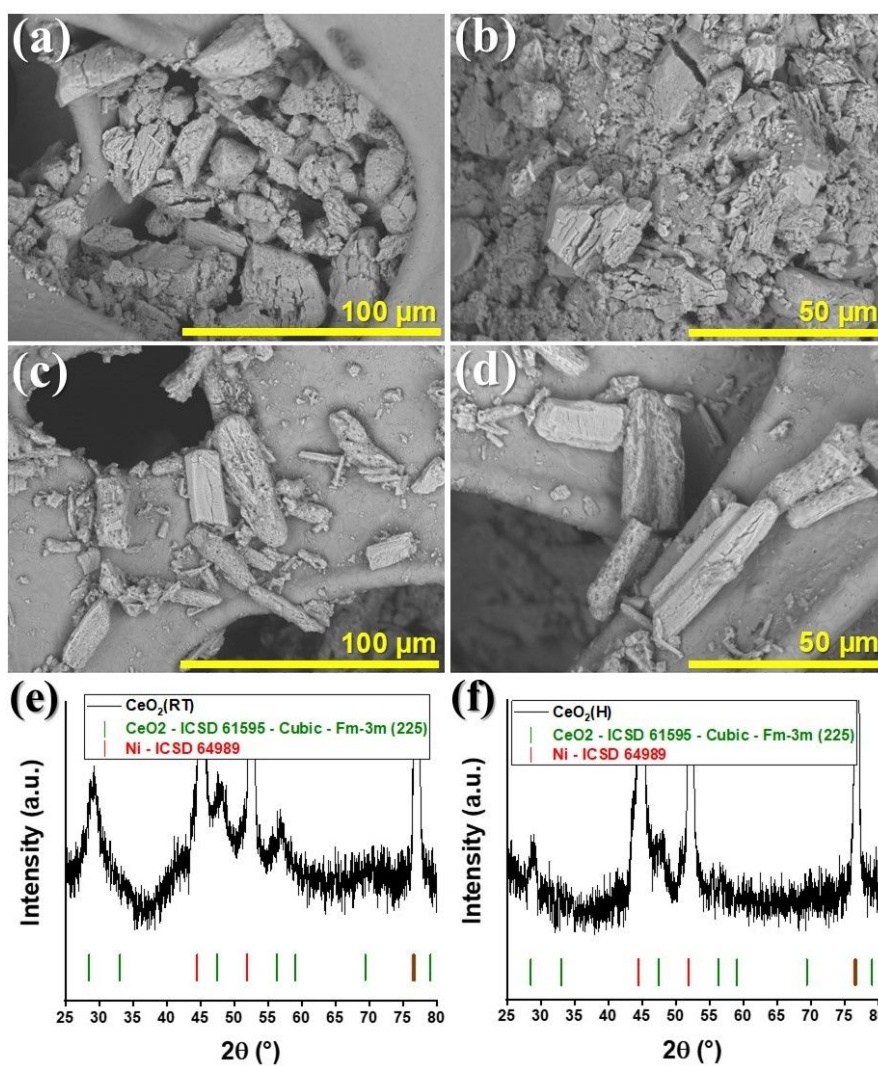

**Figure S8:** SEM images and XRD data for CeO<sub>2</sub> (H) (a,b,f) and CeO<sub>2</sub> (H) (c,d,e) electrocatalysts after the OER electrocatalysis

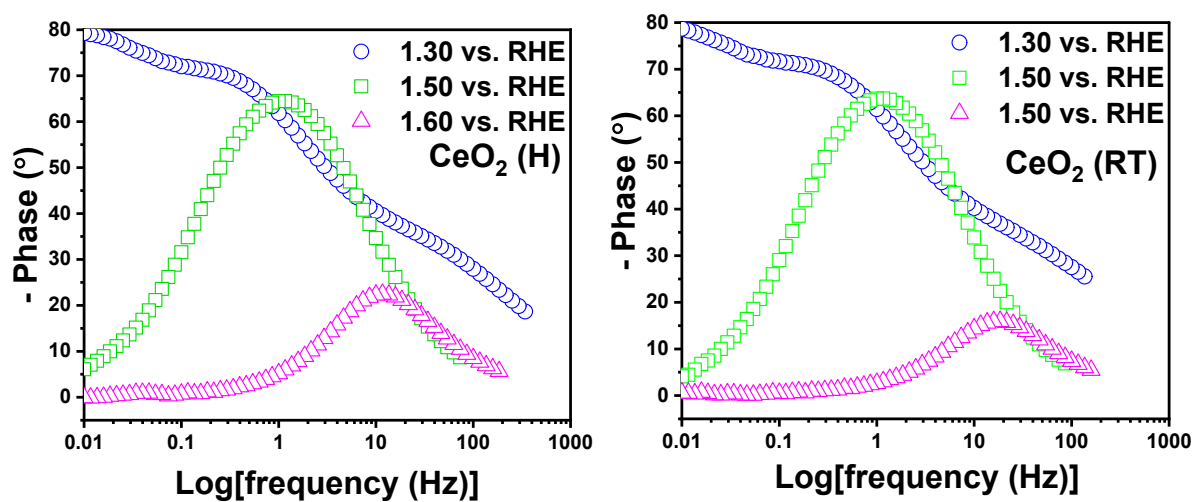

**Figure S9:** Bode plots of the electrocatalysts.
